# Supplementary material
Source: PubMed Central journal article supplement (PMC3754618)
Supplement: JCM.01132-13_zjm999092767so1.pdf [file JCM.01132-13_zjm999092767so1.pdf]

**Suppl. Table S1:** Subspecies level identification of *M. abscessus* group determined by genotyping primers showing approximate PCR sized products (Color legend identity description Turquoise = *M. abscessus*, Yellow = *M. massiliense* and Red= *M. bolletii*, CI= clinical isolate).

| Isolate     | Sequence Based Identification | PCR <i>erm</i> (41) | PCR MAB_2396 | PCR MAB_2697c  | PCR MAB_4751 | PCR MAB_4792 |
|-------------|-------------------------------|---------------------|--------------|----------------|--------------|--------------|
| ATCC 19977T | <i>M. abscessus</i>           | 700                 | 1500/500     | 1000           | 1400f/500    | 1200         |
| CCUG 50184T | <i>M. bolletii</i>            | 700                 | 750          | 1000           | 500/400      | 1200         |
| CCUG 48898T | <i>M. massiliense</i>         | 350                 | 750          | 450            | 450          | 600          |
| CI43        | <i>M. abscessus</i>           | 700                 | 1500/500     | 1000/f500      | 1400f/500    | 1200         |
| CI45        | <i>M. abscessus</i>           | 700                 | 1500/500     | 1000           | 1400f/500    | 1200         |
| CI57        | <i>M. abscessus</i>           | 700                 | 1500/500     | 1000           | 1400f/500    | 1200         |
| CI58        | <i>M. abscessus</i>           | 700                 | 1500/500     | 1000           | 1400/f500    | 1200         |
| CI59        | <i>M. bolletii</i>            | 700                 | 750          | 1000/f600/f500 | 500/400      | 1200         |
| CI510       | <i>M. massiliense</i>         | 350                 | 750          | 450            | 450          | 600          |
| CI62        | <i>M. abscessus</i>           | 700                 | 1500/500     | 1000           | 1400f/500    | 1200         |
| CI63        | <i>M. abscessus</i>           | 700                 | 1500/500     | 1000           | 1400f/500    | 650          |
| CI64        | <i>M. abscessus</i>           | 700                 | 1500/500/750 | 1000           | 1400f/500    | 1200         |
| CI65        | <i>M. abscessus</i>           | 700                 | 1500/500     | 1000           | 1400f/500    | 650          |
| CI66        | <i>M. abscessus</i>           | 700                 | 1500/500     | 1000           | 1400f        | 1200         |
| CI67        | <i>M. abscessus</i>           | 700                 | 1500/500     | 1000/f700/f500 | 1400f/500    | 1200         |
| CI68        | <i>M. abscessus</i>           | 700                 | 1500/500     | 1000/f500      | 1400f/500    | 1200         |
| CI69        | <i>M. abscessus</i>           | 700                 | 1500/500     | 1000/f500      | 1400f/500    | 1200         |
| CI610       | <i>M. abscessus</i>           | 700                 | 1500/500     | 1000           | 1400f/500    | 1200         |
| CI611       | <i>M. abscessus</i>           | 700                 | 1500/500     | 1000           | 1400f/500    | 1200         |
| CI613       | <i>M. abscessus</i>           | 700                 | 1500/500     | 1000           | 1400f/500    | 1200         |
| CI614       | <i>M. massiliense</i>         | 350                 | 750          | 450            | 375          | 600          |
| CI615       | <i>M. massiliense</i>         | 350                 | 750          | 450            | 375          | 600          |
| CI71        | <i>M. massiliense</i>         | 350                 | 750          | 450            | 450          | 600          |
| CI72        | <i>M. massiliense</i>         | 350                 | 750          | 450            | 450          | 600          |
| CI73        | <i>M. massiliense</i>         | 350                 | 750          | 450            | 450          | 600          |
| CI74        | <i>M. massiliense</i>         | 350                 | 750          | 450            | 375          | 600          |
| CI75        | <i>M. massiliense</i>         | 350                 | 750          | 450            | 375          | 600          |
| CI76        | <i>M. massiliense</i>         | 350                 | 750          | 450            | 450          | 600          |
| CI78        | <i>M. bolletii</i>            | 700                 | 750          | 1000           | 500          | 1200         |
| CI79        | <i>M. abscessus</i>           | 700                 | 1500/500     | 1000           | 1400f/500    | 1200         |
| CI82        | <i>M. abscessus</i>           | 700                 | 1500/500     | 1000           | 1400f/500    | 650          |
| CI121       | <i>M. abscessus</i>           | 700                 | 1500/500     | 1000           | 500/400      | 1200         |
| CI122       | <i>M. massiliense</i>         | 350                 | 750          | 450            | 375          | 600          |
| CI128       | <i>M. abscessus</i>           | 700                 | 1500/500     | 1000           | 1400f/500    | 650          |
| CI129       | <i>M. abscessus</i>           | 700                 | 1500/500     | 1000/f500      | 1400f/500    | 1200         |
| CI1213      | <i>M. abscessus</i>           | 700                 | 1500/500     | 1000           | 1400f/500    | 1200         |

|        |                       |     |          |           |               |      |
|--------|-----------------------|-----|----------|-----------|---------------|------|
| CI1214 | <i>M. abscessus</i>   | 700 | 750      | 1000      | 1400f/900/400 | 1200 |
| CI1215 | <i>M. abscessus</i>   | 700 | 1500/500 | 1000      | 1400f/500     | 1200 |
| CI1216 | <i>M. abscessus</i>   | 700 | 1500/500 | 1000      | 1400f/500     | 650  |
| CI1218 | <i>M. abscessus</i>   | 700 | 1500/500 | 1000      | 1400f/500     | 1200 |
| CI1219 | <i>M. abscessus</i>   | 700 | 1500/500 | 1000      | 1400f/500     | 650  |
| CI1220 | <i>M. abscessus</i>   | 700 | 1500/500 | 1000      | 1400f/500     | 650  |
| CI41   | <i>M. abscessus</i>   | 700 | 1500/500 | 1000      | 1400f/500     | 1200 |
| CI1217 | <i>M. abscessus</i>   | 700 | 1500/500 | 1000/f500 | 1400f/500     | 1200 |
| CI1210 | <i>M. massiliense</i> | 350 | 750      | 450       | 450           | 600  |
| CI11   | <i>M. massiliense</i> | 350 | 750      | 450       | 375           | 600  |
| CI154  | <i>M. massiliense</i> | 350 | 750      | 450       | 375           | 600  |
| CI2040 | <i>M. massiliense</i> | 700 | 750      | 450       | 450           | 600  |
| CI8182 | <i>M. massiliense</i> | 700 | 750      | 450       | 450           | 600  |
